# Supplementary material
Source: PubMed Central journal article supplement (PMC5310582)

**Electronic Supplementary Material**

Increased nitrogen input enhances *Kandelia obovate* seedling growth in the presence  
of invasive *Spartina alterniflora* in subtropical regions of China

Xiaowei Cui<sup>1,2</sup>, Weimin Song<sup>1\*</sup>, Jianxiang Feng<sup>2</sup>, Dai Jia<sup>1</sup>, Jiemin Guo<sup>2</sup>, Zhonglei Wang<sup>2</sup>,  
Hao Wu<sup>2</sup>, Fei Qi<sup>2</sup>, Jie Liang<sup>1</sup> and Guanghui Lin<sup>1,2\*</sup>

<sup>1</sup>*Ministry of Education Key Laboratory for Earth System Modelling, Center for Earth System  
Science, Tsinghua University, Beijing 100000, China;*

<sup>2</sup>*Division of Ocean Sciences and Technology, Graduate School at Shenzhen, Tsinghua  
University, Shenzhen 518000, China.*

*\*Authors for correspondence (wmsongo@gmail.com and lingsh@tsinghua.edu.cn).*

**Figure S1.** A schematic representation of the experimental mesocosms used in the experiment (a), and the change in water depth in the mesocosms with time (b). The picture shows a monoculture mesocosm of *K. obovata* (c), a monoculture mesocosm of *S. alterniflora* (d) and a mixed culture of *K. obovata* and *S. alterniflora* (e) at the beginning of the experiment (August 2012).

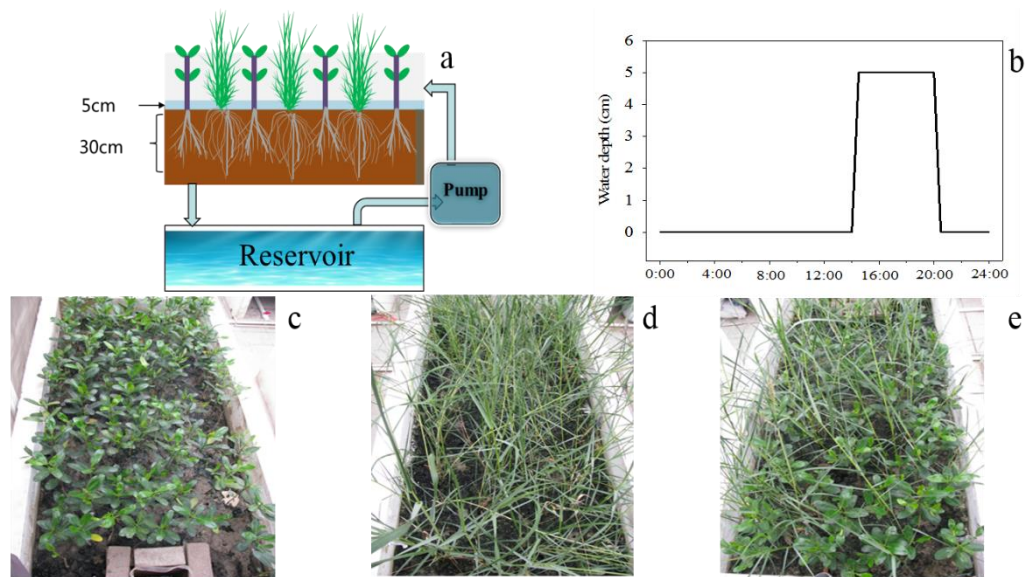

**Figure S2.** The mean soil inorganic N content at 0-10 cm depth in the three vegetation types (KO: monoculture of *K. obovata*; Mix: mixed culture of *K. obovata* and *S. alterniflora*; SA: monoculture of *S. alterniflora*) under the two nitrogen addition treatments in June 2013.

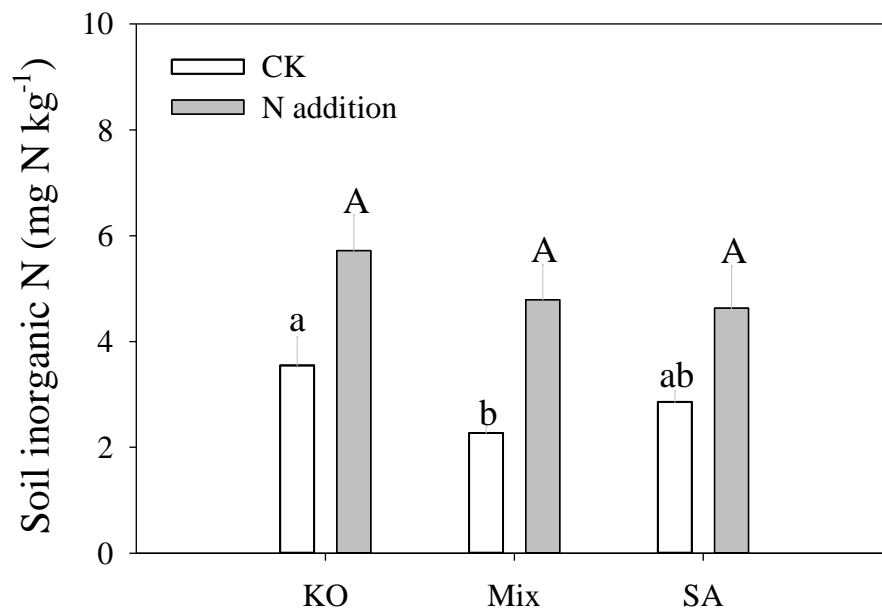

**Figure S3.** Relationship between *K. obovata* biomass and soil inorganic N content at 0-10 cm depth in June 2013. (*KO*: *K. obovata* in the monoculture; *KOmix*: *K. obovata* in the mixed culture; *KO<sub>+N</sub>* and *KOmix<sub>+N</sub>* represent *K. obovata* in the monoculture and mixed culture with the N addition treatment, respectively).

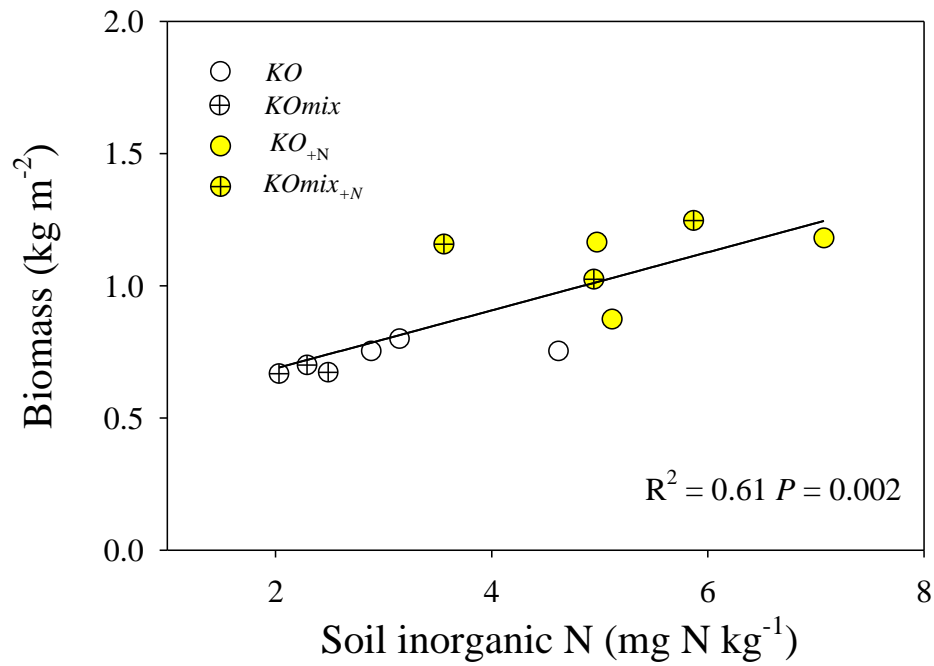

Supplement: rsbl20160760supp1.pdf [file rsbl20160760supp1.pdf]
